# Supplementary material for: Cryo-EM structure of the four-subunit Rhodobacter sphaeroides cytochrome bc1 complex in styrene maleic acid nanodiscs
Source: Proc Natl Acad Sci U S A. 2023 Mar 13;120(12):e2217922120. doi: 10.1073/pnas.2217922120 (PMC10041115; doi:10.1073/pnas.2217922120)
Supplement: Supplementary file 1 — Appendix 01 (PDF) [file pnas.2217922120.sapp.pdf]

## Supporting Information for

### Cryo-EM structure of the four-subunit *Rhodobacter sphaeroides* cytochrome *bc*<sub>1</sub> complex in styrene maleic acid nanodiscs

David J. K. Swainsbury<sup>1,2,\*</sup>, Frederick R. Hawkings<sup>2,3</sup>, Elizabeth C. Martin<sup>2</sup>, Sabina Musiał<sup>2,†</sup>, Jack H. Salisbury<sup>2</sup>, Philip J. Jackson<sup>2</sup>, David A. Farmer<sup>3</sup>, Matthew P. Johnson<sup>2</sup>, C. Alistair Siebert<sup>3</sup>, Andrew Hitchcock<sup>2</sup> and C. Neil Hunter<sup>2</sup>

Corresponding Author: Dr David J K Swainsbury

Email: [d.swainsbury@uea.ac.uk](mailto:d.swainsbury@uea.ac.uk)

#### This PDF file includes:

Tables S1 to S3

Figures S1 to S9

**Table S1.** Peptides detected by mass spectrometry analysis of purified four-subunit cyt *bc*<sub>1</sub> following digestion with pepsin. Orange shading highlights the four cyt *bc*<sub>1</sub> subunits resolved in the structure.

| Protein                                                                        | Uniprot ID | P value |       |       | Peptide spectrum matches |      |      | Sequence coverage (%) |       |       |
|--------------------------------------------------------------------------------|------------|---------|-------|-------|--------------------------|------|------|-----------------------|-------|-------|
|                                                                                |            | Rep1    | Rep2  | Rep3  | Rep1                     | Rep2 | Rep3 | Rep1                  | Rep2  | Rep3  |
| Cytochrome <i>b</i>                                                            | Q3IY10     | 0.000   | 0.000 | 0.000 | 166                      | 171  | 202  | 55.51                 | 56.18 | 56.85 |
| Cytochrome <i>c</i> <sub>1</sub>                                               | Q3IY11     | 0.000   | 0.000 | 0.000 | 194                      | 223  | 218  | 65.96                 | 66.67 | 69.12 |
| Ubiquinol-cytochrome <i>c</i> reductase iron-sulfur subunit                    | Q3IY09     | 0.000   | 0.000 | 0.000 | 21                       | 22   | 24   | 47.06                 | 49.73 | 59.36 |
| Cytochrome <i>bc</i> <sub>1</sub> subunit IV                                   | Q3J2Z2     | 0.000   | 0.000 | 0.000 | 11                       | 11   | 15   | 48.39                 | 41.94 | 35.48 |
| NADH dehydrogenase subunit L                                                   | Q3J3E6     | 0.000   | 0.000 | 0.000 | 10                       | 13   | 15   | 8.89                  | 10.97 | 13.06 |
| Uncharacterized protein                                                        | Q3J5M7     | 0.000   | nd    | nd    | 2                        | nd   | nd   | 9.63                  | nd    | nd    |
| Reaction center protein M chain                                                | Q3J1A6     | 0.000   | 0.011 | 0.000 | 3                        | 1    | 3    | 7.79                  | 3.25  | 9.74  |
| Probable cytosol aminopeptidase                                                | Q3J2C5     | 0.001   | 0.000 | 0.000 | 8                        | 7    | 11   | 9.61                  | 10.22 | 14.93 |
| Uncharacterized protein                                                        | U5NRE4     | nd      | 0.001 | 0.003 | nd                       | 2    | 1    | nd                    | 40.91 | 22.73 |
| Adenylosuccinate synthetase                                                    | Q3J0Z3     | 0.001   | nd    | 0.033 | 2                        | nd   | 1    | 3.95                  | nd    | 2.33  |
| Flagellar biosynthesis protein                                                 | Q3J1Y1     | 0.002   | nd    | 0.026 | 2                        | nd   | 2    | 0.99                  | nd    | 0.99  |
| Succinate dehydrogenase flavoprotein subunit A                                 | Q3IZ75     | 0.002   | 0.000 | 0.005 | 4                        | 6    | 6    | 6.00                  | 8.17  | 9.83  |
| Cytochrome <i>c</i> <sub>y</sub>                                               | Q3J003     | 0.003   | nd    | nd    | 2                        | nd   | nd   | 9.20                  | nd    | nd    |
| Putative tape measure protein                                                  | Q3IWX5     | 0.007   | 0.012 | 0.041 | 1                        | 1    | 1    | 1.03                  | 1.03  | 1.03  |
| Sec-independent protein translocase protein Tata                               | Q3J3D6     | 0.010   | 0.000 | 0.001 | 2                        | 2    | 2    | 30.00                 | 30.00 | 30.00 |
| Non-homologous end joining protein Ku                                          | Q3J0I8     | 0.010   | nd    | nd    | 1                        | nd   | nd   | 4.87                  | nd    | nd    |
| ABC oligo/dipeptide transporter, inner membrane subunit                        | Q3J2X9     | 0.021   | 0.000 | nd    | 5                        | 4    | nd   | 5.99                  | 5.99  | nd    |
| Reaction center protein H chain                                                | Q3J170     | 0.022   | 0.009 | nd    | 3                        | 3    | nd   | 5.77                  | 9.23  | nd    |
| L-threonine 3-dehydrogenase                                                    | Q3J3U9     | 0.047   | nd    | nd    | 11                       | nd   | nd   | 2.05                  | nd    | nd    |
| Uncharacterized protein                                                        | Q3J6L2     | nd      | 0.005 | nd    | nd                       | 1    | nd   | nd                    | 1.60  | nd    |
| Arginine utilization protein RocB                                              | Q3IZA1     | nd      | 0.009 | nd    | nd                       | 1    | nd   | nd                    | 1.31  | nd    |
| Transcriptional regulator, winged helix family                                 | Q3IWWQ0    | nd      | 0.009 | nd    | nd                       | 1    | nd   | nd                    | 3.18  | nd    |
| Glycosyltransferase                                                            | Q3IYT3     | nd      | 0.019 | nd    | nd                       | 2    | nd   | nd                    | 1.45  | nd    |
| Uncharacterized protein                                                        | Q3IVS8     | nd      | 0.019 | nd    | nd                       | 1    | nd   | nd                    | 4.11  | nd    |
| Cytochrome <i>c</i> oxidase subunit Cox1                                       | Q3J5A7     | nd      | 0.023 | 0.000 | nd                       | 2    | 2    | nd                    | 3.00  | 2.65  |
| YkuD domain-containing protein                                                 | Q3J5N3     | nd      | 0.028 | 0.041 | nd                       | 2    | 2    | nd                    | 3.57  | 3.57  |
| Protein RdxB                                                                   | P54932     | nd      | 0.045 | nd    | nd                       | 4    | nd   | nd                    | 4.61  | nd    |
| H-NS histone family protein                                                    | U5NMX2     | nd      | 0.048 | 0.007 | nd                       | 2    | 2    | nd                    | 9.78  | 9.78  |
| Na <sup>+</sup> /solute symporter                                              | Q3J0D4     | nd      | 0.050 | nd    | nd                       | 1    | nd   | nd                    | 1.65  | nd    |
| ATP synthase subunit beta 2                                                    | Q3HKK4     | nd      | nd    | 0.021 | nd                       | nd   | 2    | nd                    | nd    | 2.16  |
| Ysc84 domain-containing protein                                                | Q3J2M1     | nd      | nd    | 0.032 | nd                       | nd   | 1    | nd                    | nd    | 4.76  |
| Amino acid/amide ABC transporter substrate-binding protein, HAAT family        | Q3J5H5     | nd      | nd    | 0.032 | nd                       | nd   | 2    | nd                    | nd    | 4.60  |
| Propionyl-CoA carboxylase regulator                                            | Q3J4E6     | nd      | nd    | 0.038 | nd                       | nd   | 3    | nd                    | nd    | 3.47  |
| Phage-related protein, putative phage tail tape measure protein, lambda family | Q3J604     | nd      | nd    | 0.043 | nd                       | nd   | 4    | nd                    | nd    | 1.80  |
| UvrABC system protein B                                                        | Q3J4P6     | nd      | nd    | 0.045 | nd                       | nd   | 2    | nd                    | nd    | 2.06  |
| ABC Fe <sup>3+</sup> -siderophore transporter, inner membrane subunit          | Q3IWR6     | nd      | nd    | 0.046 | nd                       | nd   | 2    | nd                    | nd    | 2.89  |

**Table S2. Cryo-EM data collection, refinement, and validation statistics.**

|                                                     | Cyt <i>bc</i> <sub>1</sub> consensus (b-b)<br>(EMD-15616)<br>(PDB-8ASI) | Cyt <i>bc</i> <sub>1</sub> focussed refine (c-b)<br>(EMD-15617)<br>(PDB-8ASJ) |
|-----------------------------------------------------|-------------------------------------------------------------------------|-------------------------------------------------------------------------------|
| <b>Data collection and processing</b>               |                                                                         |                                                                               |
| Magnification                                       | 130 000 x                                                               | -                                                                             |
| Electron exposure (e <sup>-</sup> /Å <sup>2</sup> ) | 40                                                                      | -                                                                             |
| Defocus range                                       | -0.8 to -2.0 μm                                                         | -                                                                             |
| Pixel size (Å)                                      | 0.651                                                                   | -                                                                             |
| Symmetry imposed                                    | C1                                                                      | C1                                                                            |
| Initial particle images (no.)                       | 4 060 135                                                               | -                                                                             |
| Final particle images (no.)                         | 282 636 (7%)                                                            | 72 118                                                                        |
| Initial model used (PDB code)                       | RELION <i>de novo</i> model                                             | -                                                                             |
| Map resolution (Å)                                  | 2.9                                                                     | 3.75                                                                          |
| FSC threshold                                       | 0.143                                                                   | 0.500                                                                         |
| Model resolution range (Å)                          | 2.6 – 4                                                                 | Not determined                                                                |
| Map sharpening <i>B</i> factor (Å <sup>2</sup> )    | -117.187 (unsharpened map)                                              | -114.875 (unsharpened map)                                                    |
| <b>Model Composition and validation</b>             |                                                                         |                                                                               |
| Non-hydrogen atoms                                  | 14726                                                                   | 14726                                                                         |
| Protein residues                                    | 1789                                                                    | 1789                                                                          |
| Ligands                                             | 21                                                                      | 21                                                                            |
| Bond lengths (Å)                                    | 0.004 (0)                                                               | 0.003 (0)                                                                     |
| Bond angles (°)                                     | 1.079 (12)                                                              | 0.804 (22)                                                                    |
| Validation                                          |                                                                         |                                                                               |
| MolProbity score                                    | 1.38                                                                    | 1.40                                                                          |
| Clashscore                                          | 5.03                                                                    | 3.80                                                                          |
| Rotamer outliers (%)                                | 0.00                                                                    | 0.21                                                                          |
| Ramachandran plot                                   |                                                                         |                                                                               |
| Favoured (%)                                        | 97.41                                                                   | 96.50                                                                         |
| Allowed (%)                                         | 2.54                                                                    | 3.38                                                                          |
| Outliers (%)                                        | 0.06                                                                    | 0.11                                                                          |

**Table S3: Primers used for generation of strains.** Restriction sites used for cloning are underlined.

| Primer Name           | Sequence                                                                 |
|-----------------------|--------------------------------------------------------------------------|
| <i>znuC</i> TGATGA UF | CCGGAATTCGAGGTGGCGGACCGTCAG                                              |
| <i>znuC</i> TGATGA F  | CACGACCATACGtgatgaCACGATCATTCC                                           |
| <i>znuC</i> TGATGA R  | GGAATGATCGTGtcatcaCGTATGGTCGTG                                           |
| <i>znuC</i> KO DR     | CGGCAAGCTTGCGAGGATGTCGCCGAAGAG                                           |
| RSP2687 UF            | CCGGAATTCGATCATCTCGCGCCTCAAGATGGACGCCGACATGTTCTCATTTCATCGTC<br>TATCCCATC |
| RSP2687 UR            | GATGGGATAGACGATGAATGAGAACATGTGCGGCGTC                                    |
| RSP2687 DF            | TTCTCATTTCATCGTCTATCCCATCGAATGACCCGGGCTACAAATGAGCACGCGTCTCAA<br>GCTTGCCG |
| RSP2687 DR            | CGGCAAGCTTGAGACGCGTGCTCATTGTAGC                                          |

MFS **F**I**D**DI**P**S**F**E**Q**I**K**A**R**V**R****D**D**L**R**K**H**G**W**E**K**R**  
 W**N**D**S**R**L****V**Q**K**S**R**E**L**L**N**D**E**E**L**K**I**D**P**A**T**W**I**W**K**R  
 M**P**S**R**E**E**V**A**A**R**R**Q**R**D**F**E**T**V****W****K****Y****R****Y****R****L****G****G****F****A****S**  
**G****A****L****L****A****L****A****G****I****F****S****T****G****N****F****G****G****S****S****D****A****G****N****R****P****S****V**  
**Y****P****I****E**

**Figure S1. Sequence of SIV (Uniprot ID Q3J2Z2).** Peptides identified by mass spectrometry of purified cyt *bc*<sub>1</sub> highlighted green and resolved residues underlined in bold text.

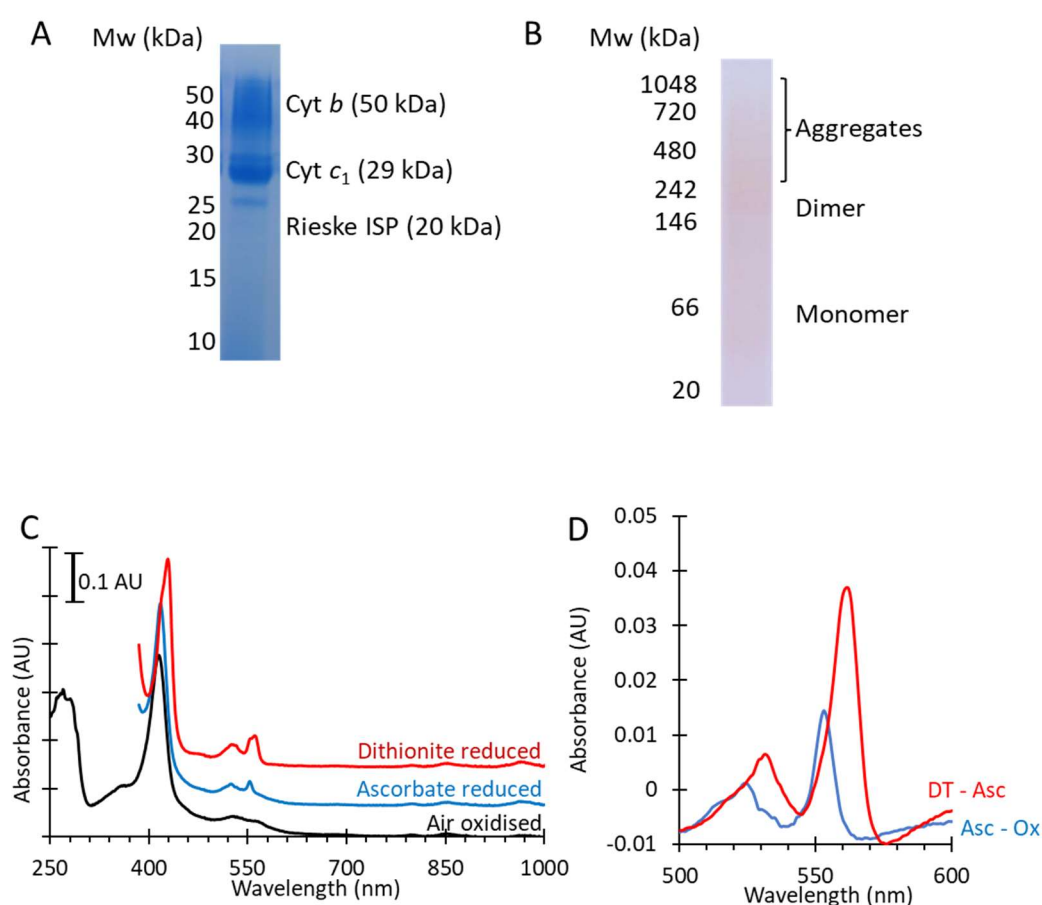

**Figure S2. Gels and spectra of purified cyt *bc*<sub>1</sub> complexes from the  $\Delta$ SIV background.** (A) Coomassie stained SDS page gel of purified  $\Delta$ SIV cyt *bc*<sub>1</sub> complexes. Each band is labelled with its identity and mass. (B) CN-PAGE gel of purified  $\Delta$ SIV cyt *bc*<sub>1</sub> complexes with the oligomeric state indicated. (C) UV/Vis/NIR spectra of  $\Delta$ SIV cyt *bc*<sub>1</sub> complexes as prepared (air oxidised) and following the addition of sodium ascorbate to reduce the *c* heme, and sodium dithionite to reduce all heme. (D) Ascorbate reduced minus ferricyanide oxidised (Asc - Ox), and dithionite reduced minus ascorbate reduced (DT - Asc) spectra in the 500-600 nm region used for determination of *c* and *b* heme concentrations, respectively. The heme *b* to heme *c* ratio was 1.7:1.

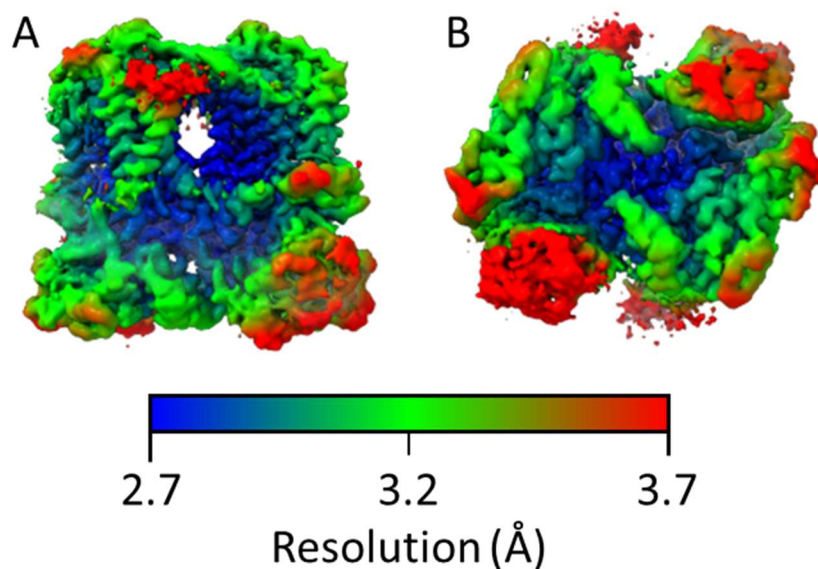

**Figure S3.** Locally sharpened maps viewed in the plane of the membrane (A) and from the periplasmic face (B). The scale bar indicates the local resolution.

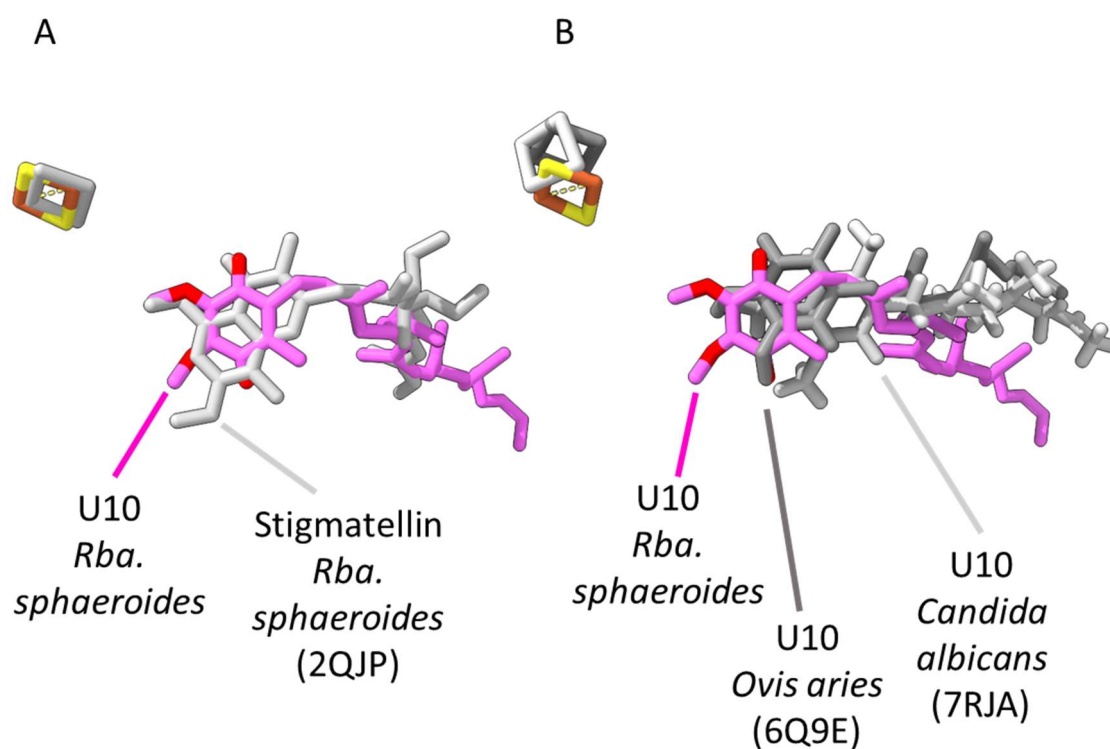

**Figure S4.** Comparison of the position of ubiquinone (U10) and stigmatellin in the  $Q_o$  sites of cyt  $bc_1$  complexes. (A) Overlay of U10 in our structure with stigmatellin bound to the *Rba. sphaeroides* complex (PDB ID: 2QJP). (B) Overlay of U10 in our structure with  $Q_o$  quinones bound to complex III from *Ovis aries* (PDB ID:6Q9E, Dark grey) and *Candida albicans* (PDB ID:7RJA, light grey).

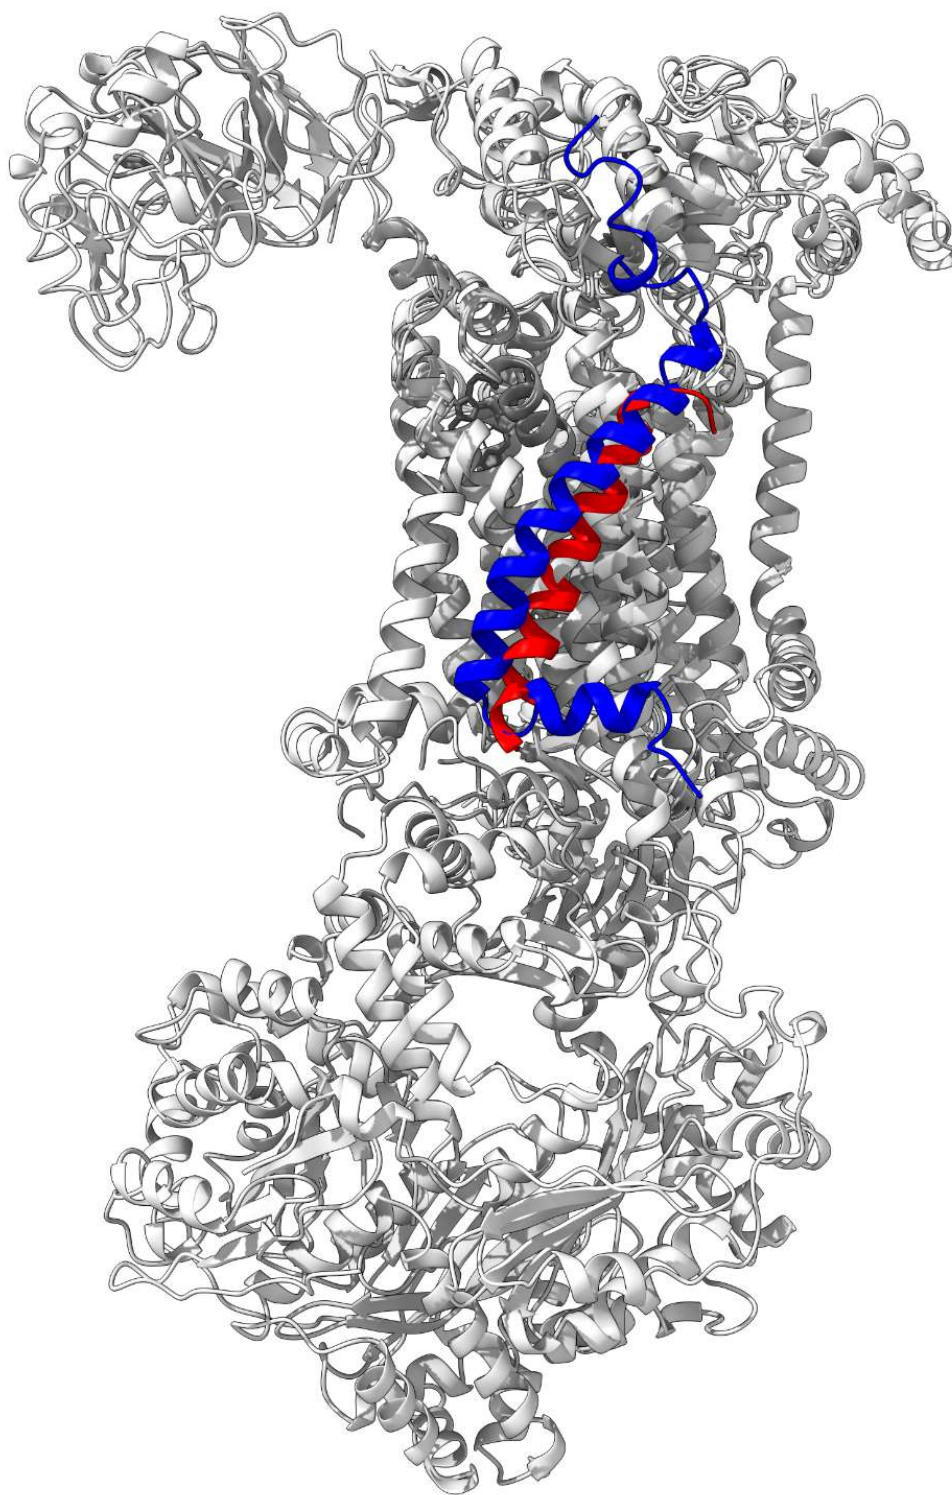

**Figure S5. Comparison of the position of *Rba. sphaeroides* SIV with the UQCR10 subunit in the bovine complex.** One monomer from the four subunit *Rba. sphaeroides* cyt *bc*<sub>1</sub> and the eleven-subunit bovine complex III (PDB ID: 1BE3) aligned to their catalytic subunits. Subunits for both complexes are shown in grey except *Rba. sphaeroides* SIV (red) and bovine UQCR10 (blue).

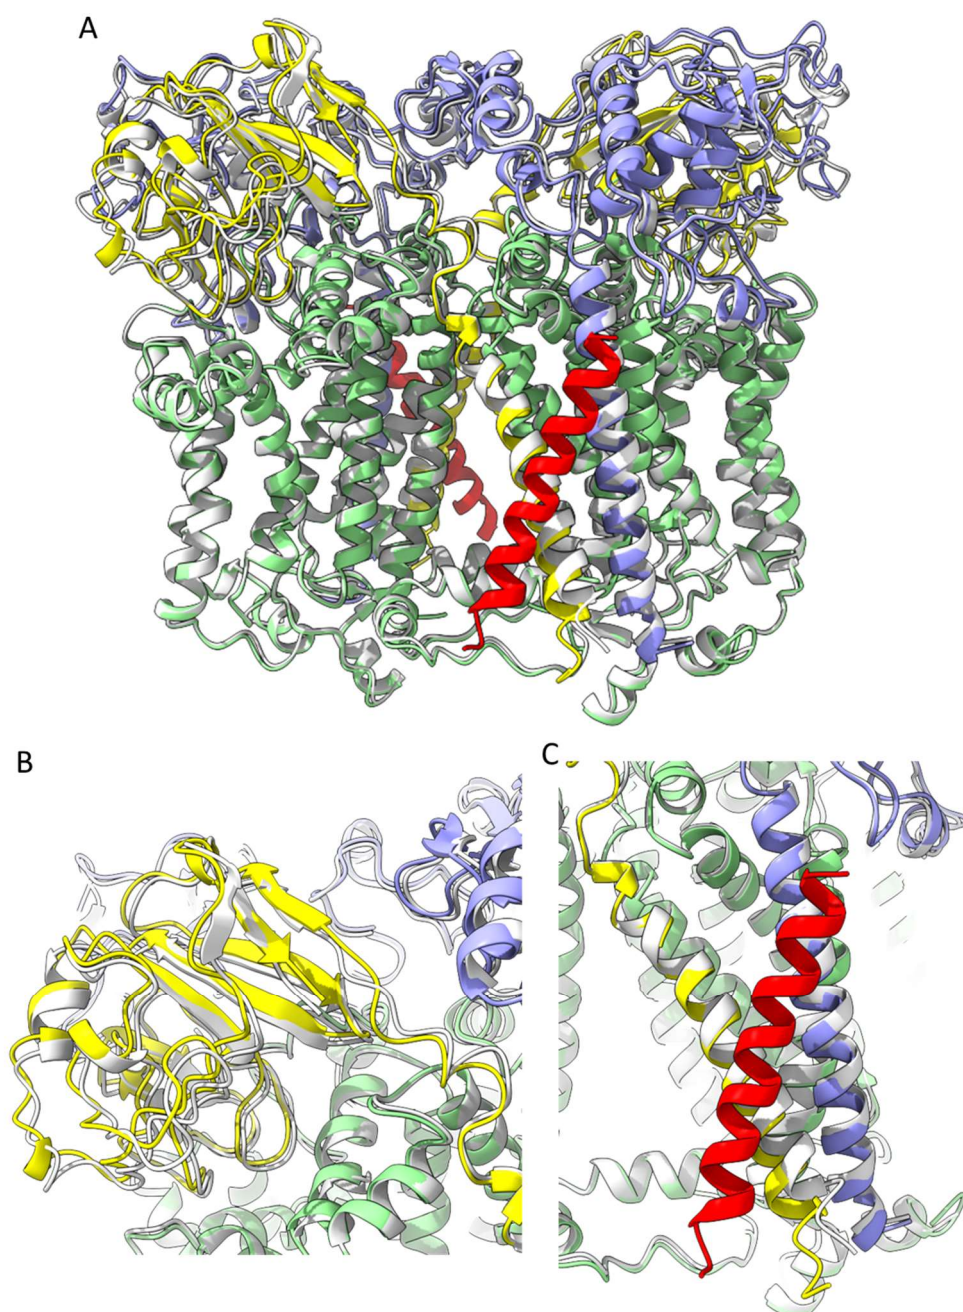

**Figure S6. Alignment of the four- and three-subunit *Rba. sphaeroides* cyt *bc*<sub>1</sub> complexes.** Alignment of our cryo-EM structure (coloured as in Figure 1 of the main paper) with the crystal structure of the complex lacking SIV (grey) (PDB ID: 2QJP). (A) Complete views of both complexes. (B) Zoomed in view of one Rieske head domain. (C) View of the SIV, cyt *c*<sub>1</sub> and Rieske TMHs.

A

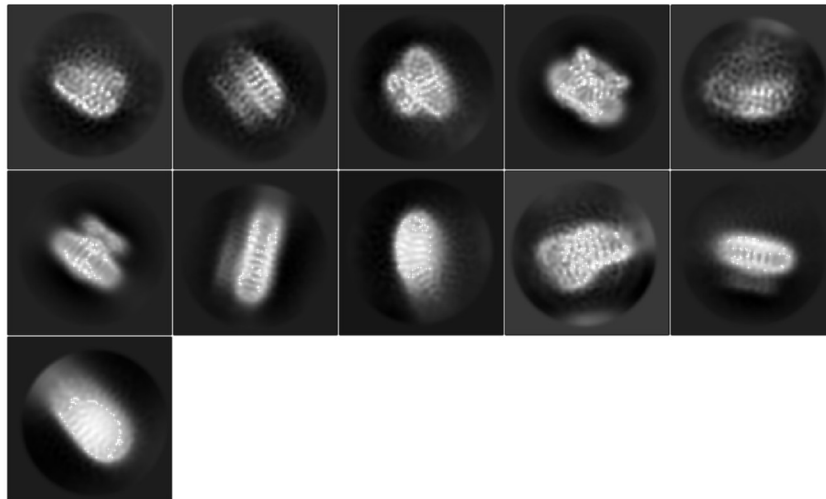

B

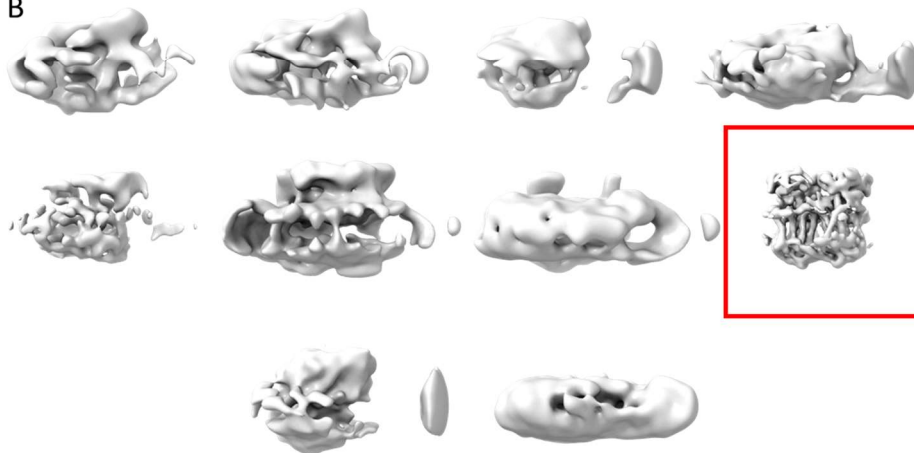

**Figure S7. 2D and 3D classes from cryo-EM data processing.** (A) Selected 2D classes after the fifth round of 2D classification. (B) 3D classes after two rounds of 3D classification. Class 8, indicated with a red square, was taken forward for refinement.

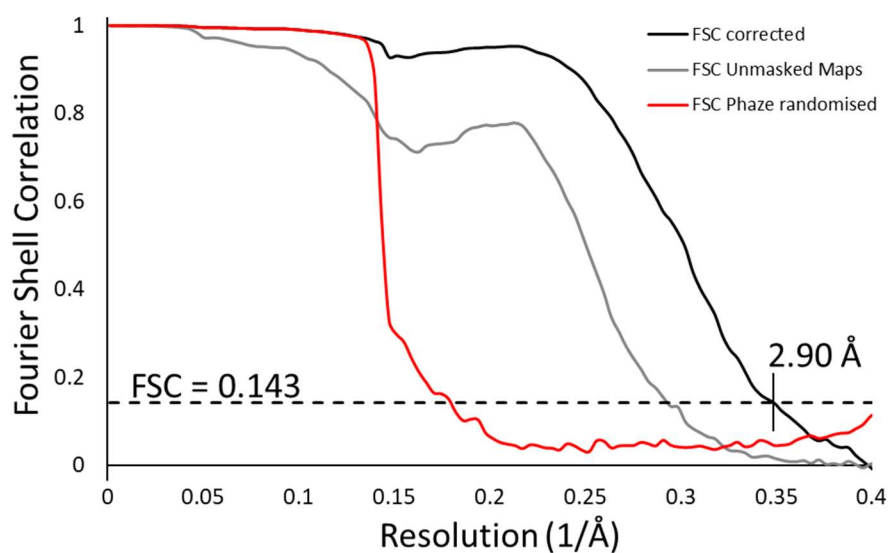

**Figure S8. FSC curves for the final map.** The resolution was determined with FSC = 0.143.

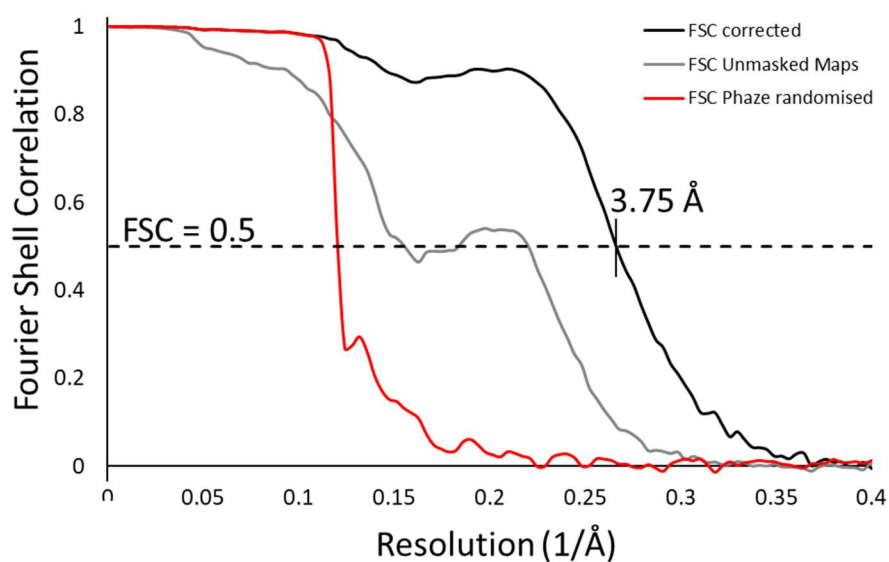

**Figure S9. FSC curves for the focussed class showing an alternative conformation for the Rieske subunit.** The resolution was estimated with FSC=0.5.
